# Supplementary material
Source: PubMed Central journal article supplement (PMC5441683)

**Supplemental Figure 4**

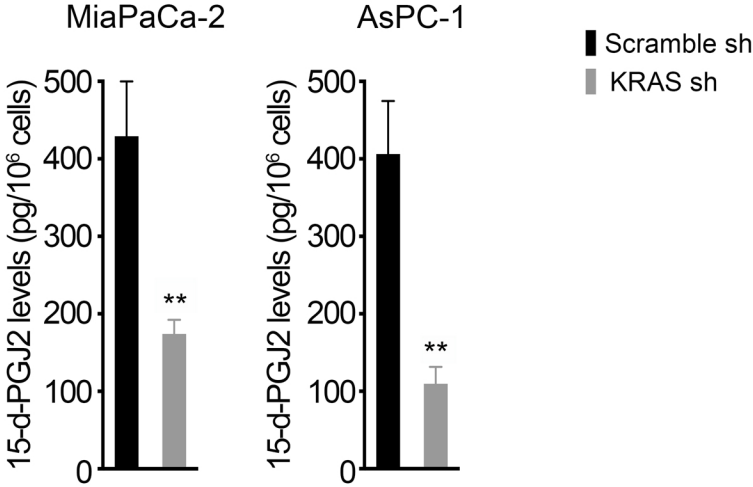

Supplement: NIHMS834445-supplement-4.pdf [file NIHMS834445-supplement-4.pdf]
